# Supplementary material for: Hundred top-cited articles focusing on acute kidney injury: a bibliometric analysis
Source: PubMed Central journal article supplement — BMJ Open. 2016 Jul 27;6(7):e011630. doi: 10.1136/bmjopen-2016-011630 (PMC4964173; doi:10.1136/bmjopen-2016-011630), 2016-07-27
Supplement: bmjopen-2016-011630supp.pdf [file bmjopen-2016-011630supp.pdf]

**Table S1.** Bibliometric information of the other T100 articles in acute kidney injury which were not shown in Table 1

| Rank | Authors            | Title                                                                                                                                           | Journal                           | Year | Times Cited (Web) | Citation Index (Web) | Times Cited (Scopus) |
|------|--------------------|-------------------------------------------------------------------------------------------------------------------------------------------------|-----------------------------------|------|-------------------|----------------------|----------------------|
| 21   | Palevsky, PM et al | Intensity of renal support in critically ill patients with acute kidney injury                                                                  | New England Journal of Medicine   | 2008 | 510               | 63.75                | 607                  |
| 22   | Oliver, J et al    | The pathogenesis of acute renal failure associated with traumatic and toxic injury; renal ischemia, nephrotoxic damage and the ischemic episode | Journal of Clinical Investigation | 1951 | 498               | 7.66                 | NA                   |
| 23   | Hoste, EA et al    | RIFLE criteria for acute kidney injury are associated with hospital mortality in critically ill patients: a cohort analysis                     | Critical Care                     | 2006 | 491               | 49.10                | 652                  |
| 24   | Kelly, KJ et al    | Intercellular adhesion molecule-1-deficient mice are protected against ischemic renal injury                                                    | Journal of Clinical Investigation | 1996 | 471               | 23.55                | 501                  |
| 25   | Schrier, RW et al  | Mechanisms of disease: Acute renal failure and sepsis                                                                                           | New England Journal of Medicine   | 2004 | 465               | 38.75                | 251                  |

|    |                    |                                                                                                         |                                 |      |     |       |     |
|----|--------------------|---------------------------------------------------------------------------------------------------------|---------------------------------|------|-----|-------|-----|
| 26 | Liano, F et al     | Epidemiology of acute renal failure: A prospective, multicenter, community-based study                  | Kidney International            | 1996 | 464 | 23.20 | 563 |
| 27 | Lameire, N et al   | Acute renal failure                                                                                     | Lancet                          | 2005 | 439 | 39.91 | 569 |
| 28 | Metnitz, PGH et al | Effect of acute renal failure requiring renal replacement therapy on outcome in critically ill patients | Critical Care Medicine          | 2002 | 438 | 31.29 | 534 |
| 29 | Grossman, RA et al | Nontraumatic rhabdomyolysis and acute renal failure                                                     | New England Journal of Medicine | 1974 | 433 | 10.31 | 215 |
| 30 | Star, RA et al     | Treatment of acute renal failure                                                                        | Kidney International            | 1998 | 428 | 23.78 | 501 |
| 31 | Schiffl, H et al   | Daily hemodialysis and the outcome of acute renal failure                                               | New England Journal of Medicine | 2002 | 415 | 29.64 | 549 |
| 32 | Hollenbe.NK et al  | Acute oliguric renal failure in man: evidence for preferential renal cortical ischemia                  | Medicine                        | 1968 | 409 | 8.52  | 105 |
| 33 | Uchino, S et al    | An assessment of the RIFLE criteria for acute renal failure in hospitalized patients                    | Critical Care Medicine          | 2006 | 407 | 40.70 | 475 |

|           |                           |                                                                                                                                                        |                                               |      |     |       |     |
|-----------|---------------------------|--------------------------------------------------------------------------------------------------------------------------------------------------------|-----------------------------------------------|------|-----|-------|-----|
| <b>34</b> | Bonventre, JV et al       | Recent advances in the pathophysiology of ischemic acute renal failure                                                                                 | Journal of the American Society of Nephrology | 2003 | 401 | 30.85 | 448 |
| <b>35</b> | Haase, M et al            | Accuracy of Neutrophil Gelatinase-Associated Lipocalin (NGAL) in Diagnosis and Prognosis in Acute Kidney Injury: A Systematic Review and Meta-analysis | American Journal of Kidney Diseases           | 2009 | 394 | 56.29 | 479 |
| <b>36</b> | Fouque, D et al           | A proposed nomenclature and diagnostic criteria for protein-energy wasting in acute and chronic kidney disease                                         | Kidney International                          | 2008 | 392 | 49.00 | 454 |
| <b>37</b> | Herget-Rosenthal, S et al | Early detection of acute renal failure by serum cystatin C                                                                                             | Kidney International                          | 2004 | 384 | 32.00 | 488 |
| <b>38</b> | Mueller, C et al          | Prevention of contrast media-associated nephropathy - Randomized comparison of 2 hydration regimens in 1620 patients undergoing coronary angioplasty   | Archives of Internal Medicine                 | 2002 | 372 | 26.57 | 541 |
| <b>39</b> | Morigi, M et al           | Mesenchymal stem cells are renotropic,                                                                                                                 | Journal of the American                       | 2004 | 369 | 30.75 | 433 |

helping to repair the kidney and improve function in acute renal failure Society of Nephrology

|    |                      |                                                                                                                                                               |                                                                                 |      |     |       |     |
|----|----------------------|---------------------------------------------------------------------------------------------------------------------------------------------------------------|---------------------------------------------------------------------------------|------|-----|-------|-----|
| 40 | Bonventre, JV et al  | Mechanisms of ischemic acute renal failure                                                                                                                    | Kidney International                                                            | 1993 | 366 | 15.91 | 359 |
| 41 | Kelly, KJ et al      | Antibody to intercellular adhesion molecule 1 protects the kidney against ischemic injury                                                                     | Proceedings of the National Academy of Sciences of the United States of America | 1994 | 354 | 16.09 | 345 |
| 42 | Devarajan, P et al   | Update on mechanisms of ischemic acute kidney injury                                                                                                          | Journal of the American Society of Nephrology                                   | 2006 | 351 | 35.10 | 370 |
| 43 | de Mendonca, A et al | Acute renal failure in the ICU: risk factors and outcome evaluated by the SOFA score                                                                          | Intensive Care Medicine                                                         | 2000 | 349 | 21.81 | 436 |
| 44 | Abel, RM et al       | Improved survival from acute renal failure after treatment with intravenous essential L-amino acids and glucose. Results of a prospective, double-blind study | New England Journal of Medicine                                                 | 1973 | 345 | 8.02  | 133 |
| 45 | Humes, HD et al      | Epidermal growth factor enhances renal tubule cell regeneration and repair and accelerates the recovery of renal function                                     | Journal of Clinical Investigation                                               | 1989 | 336 | 12.44 | 217 |

in postischemic acute renal failure

|           |                       |                                                                                                  |                                                                                 |      |     |       |     |
|-----------|-----------------------|--------------------------------------------------------------------------------------------------|---------------------------------------------------------------------------------|------|-----|-------|-----|
| <b>46</b> | Bonventre, JV et al   | Ischemic acute renal failure: An inflammatory disease?                                           | Kidney International                                                            | 2004 | 335 | 27.92 | 368 |
| <b>47</b> | Schrier, RW et al     | Acute renal failure: definitions, diagnosis, pathogenesis, and therapy                           | Journal of Clinical Investigation                                               | 2004 | 332 | 27.67 | 376 |
| <b>48</b> | Kawaida, K et al      | Hepatocyte growth factor prevents acute renal failure and accelerates renal regeneration in mice | Proceedings of the National Academy of Sciences of the United States of America | 1994 | 329 | 14.95 | 309 |
| <b>49</b> | Ricci, Z. et al       | The RIFLE criteria and mortality in acute kidney injury: A systematic review                     | Kidney International                                                            | 2008 | 325 | 40.63 | 374 |
| <b>50</b> | Marenzi, G et al      | N-acetylcysteine and contrast-induced nephropathy in primary angioplasty                         | New England Journal of Medicine                                                 | 2006 | 323 | 32.30 | 402 |
| <b>51</b> | Akcan-Arikan, A et al | Modified RIFLE criteria in critically ill children with acute kidney injury                      | Kidney International                                                            | 2007 | 320 | 35.56 | 368 |
| <b>52</b> | Ishani, Areef et al   | Acute Kidney Injury Increases Risk of ESRD among Elderly                                         | Journal of the American Society of Nephrology                                   | 2009 | 319 | 45.57 | 364 |
| <b>53</b> | Mehta, RL et al       | Spectrum of acute renal failure in the                                                           | Kidney International                                                            | 2004 | 315 | 26.25 | 368 |

intensive care unit: The PICARD  
experience

|            |                          |                                                                                                                                                                   |                                                        |      |     |       |     |
|------------|--------------------------|-------------------------------------------------------------------------------------------------------------------------------------------------------------------|--------------------------------------------------------|------|-----|-------|-----|
| <b>54</b>  | Rosner, Mitchell H et al | Acute kidney injury associated with cardiac surgery                                                                                                               | Clinical Journal of the American Society of Nephrology | 2006 | 310 | 31.00 | 341 |
| <b>55</b>  | Mehta, RL et al          | A randomized clinical trial of continuous versus intermittent dialysis for acute renal failure                                                                    | Kidney International                                   | 2001 | 309 | 20.60 | 401 |
| <b>56</b>  | Hakim, RM et al          | Effect of the dialysis membrane in the treatment of patients with acute renal failure                                                                             | New England Journal of Medicine                        | 1994 | 307 | 13.95 | 287 |
| <b>57</b>  | Conlon, PJ et al         | Acute renal failure following cardiac surgery                                                                                                                     | Nephrology Dialysis Transplantation                    | 1999 | 304 | 17.88 | 395 |
| <b>58a</b> | Nickolas, Thomas L et al | Sensitivity and specificity of a single emergency department measurement of urinary neutrophil gelatinase-associated lipocalin for diagnosing acute kidney injury | Annals of Internal Medicine                            | 2008 | 303 | 37.88 | 344 |

|            |                              |                                                                                                    |                                                           |      |     |       |     |
|------------|------------------------------|----------------------------------------------------------------------------------------------------|-----------------------------------------------------------|------|-----|-------|-----|
| <b>58b</b> | Anderson, RJ et al           | Nonoliguric acute renal failure                                                                    | New England Journal of<br>Medicine                        | 1977 | 303 | 7.77  | 157 |
| <b>59a</b> | McCullough, Peter A<br>et al | Contrast-induced acute kidney injury                                                               | Journal of the American College<br>of Cardiology          | 2008 | 302 | 37.75 | 366 |
| <b>59b</b> | Zager, RA et al              | Rhabdomyolysis and myohemoglobinuric<br>acute renal failure                                        | Kidney International                                      | 1996 | 302 | 15.10 | 372 |
| <b>59c</b> | Swann, RC et al              | The clinical course of acute renal failure                                                         | Medicine                                                  | 1953 | 302 | 4.79  | 2   |
| <b>60</b>  | Better, OS et al             | Early management of shock and<br>prophylaxis of acute renal failure in<br>traumatic rhabdomyolysis | New England Journal of<br>Medicine                        | 1990 | 301 | 11.58 | 331 |
| <b>61</b>  | Miller, TR et al             | Urinary diagnostic indices in acute renal<br>failure: a prospective study                          | Annals of Internal Medicine                               | 1978 | 298 | 7.84  | 163 |
| <b>62</b>  | Xue, Jay L et al             | Incidence and mortality of acute renal<br>failure in Medicare beneficiaries, 1992 to<br>2001       | Journal of the American<br>Society of Nephrology          | 2006 | 296 | 29.60 | 326 |
| <b>63</b>  | Bennett, Michael et al       | Urine NGAL predicts severity of acute<br>kidney injury after cardiac surgery: A                    | Clinical Journal of the American<br>Society of Nephrology | 2008 | 294 | 36.75 | 344 |

|    |                          |                                                                                                                       |                                   |      |     |       |     |
|----|--------------------------|-----------------------------------------------------------------------------------------------------------------------|-----------------------------------|------|-----|-------|-----|
|    |                          | prospective study                                                                                                     |                                   |      |     |       |     |
| 64 | Ostermann, Marlies et al | Acute kidney injury in the intensive care unit according to RIFLE                                                     | Critical Care Medicine            | 2007 | 288 | 32.00 | 324 |
| 65 | Noiri, E et al           | In vivo targeting of inducible NO synthase with oligodeoxynucleotides protects rat kidney against ischemia            | Journal of Clinical Investigation | 1996 | 277 | 13.85 | 272 |
| 66 | Oken, DE et al           | Glycerol-induced hemoglobinuric acute renal failure in the rat. I. Micropuncture study of the development of oliguria | Journal of Clinical Investigation | 1966 | 275 | 5.50  | 65  |
| 67 | Barrett, BJ et al        | Preventing nephropathy induced by contrast medium                                                                     | New England Journal of Medicine   | 2006 | 274 | 27.40 | 347 |
| 68 | Parikh, C. R. et al      | Urinary IL-18 is an early predictive biomarker of acute kidney injury after cardiac surgery                           | Kidney International              | 2006 | 267 | 26.70 | 309 |
| 69 | Payen, Didier et al      | A positive fluid balance is associated with a worse outcome in patients with acute renal failure                      | Critical Care                     | 2008 | 265 | 33.13 | 309 |



|            |                        |                                                                                                                                                                                                   |                                                 |      |     |       |     |
|------------|------------------------|---------------------------------------------------------------------------------------------------------------------------------------------------------------------------------------------------|-------------------------------------------------|------|-----|-------|-----|
| <b>70a</b> | Ichimura, T et al      | Kidney injury molecule-1: a tissue and urinary biomarker for nephrotoxicant-induced renal injury                                                                                                  | American Journal of Physiology-Renal Physiology | 2004 | 264 | 22.00 | 330 |
| <b>70b</b> | Bouman, CSC et al      | Effects of early high-volume continuous venovenous hemofiltration on survival and recovery of renal function in intensive care patients with acute renal failure: A prospective, randomized trial | Critical Care Medicine                          | 2002 | 264 | 18.86 | 303 |
| <b>71a</b> | Wagener, Gebhard et al | Association between increases in urinary neutrophil gelatinase-associated lipocalin and acute renal dysfunction after adult cardiac surgery                                                       | Anesthesiology                                  | 2006 | 263 | 26.30 | 312 |
| <b>71b</b> | Koffler, A et al       | Acute renal failure due to nontraumatic rhabdomyolysis                                                                                                                                            | Annals of Internal Medicine                     | 1976 | 263 | 6.58  | 117 |
| <b>72a</b> | Chertow, GM et al      | Prognostic stratification in critically ill patients with acute renal failure requiring dialysis                                                                                                  | Archives of Internal Medicine                   | 1995 | 262 | 12.48 | 282 |

|            |                    |                                                                                                         |                                               |      |     |       |     |
|------------|--------------------|---------------------------------------------------------------------------------------------------------|-----------------------------------------------|------|-----|-------|-----|
| <b>72b</b> | Schiffl, H et al   | Biocompatible membranes in acute renal failure: prospective case-controlled study                       | Lancet                                        | 1994 | 262 | 11.91 | 242 |
| <b>73a</b> | Birck, R et al     | Acetylcysteine for prevention of contrast nephropathy: meta-analysis                                    | Lancet                                        | 2003 | 260 | 20.00 | 388 |
| <b>73b</b> | Byrd, L et al      | Radiocontrast-induced acute renal failure: a clinical and pathophysiologic review                       | Medicine                                      | 1979 | 260 | 7.03  | 123 |
| <b>74a</b> | Marenzi, G et al   | Contrast-induced nephropathy in patients undergoing primary angioplasty for acute myocardial infarction | Journal of the American College of Cardiology | 2004 | 259 | 21.58 | 297 |
| <b>74b</b> | Ali, Tariq et al   | Incidence and outcomes in acute kidney injury: A comprehensive population-based study                   | Journal of the American Society of Nephrology | 2007 | 259 | 28.78 | 297 |
| <b>75a</b> | Sharples, EJ et al | Erythropoietin protects the kidney against the injury and dysfunction caused by ischemia-reperfusion    | Journal of the American Society of Nephrology | 2004 | 257 | 21.42 | 287 |
| <b>75b</b> | Dangas, G et al    | Contrast-induced nephropathy after percutaneous coronary interventions in                               | American Journal of Cardiology                | 2005 | 257 | 23.36 | 309 |

|            |                     |                                                                                                  |                                                   |      |     |       |     |
|------------|---------------------|--------------------------------------------------------------------------------------------------|---------------------------------------------------|------|-----|-------|-----|
|            |                     | relation to chronic kidney disease and hemodynamic variables                                     |                                                   |      |     |       |     |
| <b>76</b>  | Thakar, CV et al    | A clinical score to predict acute renal failure after cardiac surgery                            | Journal of the American Society of Nephrology     | 2005 | 254 | 23.09 | 304 |
| <b>77a</b> | Mehta, RL et al     | Diuretics, mortality, and nonrecovery of renal function in acute renal failure                   | JAMA- Journal of the American Medical Association | 2002 | 253 | 18.07 | 290 |
| <b>77b</b> | Coca, S. G et al    | Biomarkers for the diagnosis and risk stratification of acute kidney injury: A systematic review | Kidney International                              | 2008 | 253 | 31.63 | 351 |
| <b>77c</b> | Bonventre, JV et al | Dedifferentiation and proliferation of surviving epithelial cells in acute renal failure         | Journal of the American Society of Nephrology     | 2003 | 253 | 19.46 | 300 |
| <b>78</b>  | Norman, DJ et al    | Myolysis and acute renal failure in a heart-transplant recipient receiving lovastatin            | New England Journal of Medicine                   | 1988 | 252 | 9.00  | 162 |
| <b>79</b>  | Tomita, K et al     | Plasma endothelin levels in patients with acute renal failure                                    | New England Journal of Medicine                   | 1989 | 250 | 9.26  | 140 |

|            |                       |                                                                                                                                                                 |                                                   |      |     |       |     |
|------------|-----------------------|-----------------------------------------------------------------------------------------------------------------------------------------------------------------|---------------------------------------------------|------|-----|-------|-----|
| <b>80</b>  | Lin, FM et al         | Hematopoietic stem cells contribute to the regeneration of renal tubules after renal ischemia-reperfusion injury in mice                                        | Journal of the American Society of Nephrology     | 2003 | 247 | 19.00 | 304 |
| <b>81</b>  | Sutton, TA et al      | Microvascular endothelial injury and dysfunction during ischemic acute renal failure                                                                            | Kidney International                              | 2002 | 244 | 17.43 | 271 |
| <b>82a</b> | Arendshorst, WJ et al | Pathogenesis of acute renal failure following temporary renal ischemia in the rat                                                                               | Circulation Research                              | 1975 | 243 | 5.93  | 285 |
| <b>82b</b> | Parikh, CR et al      | Urine IL-18 is an early diagnostic marker for acute kidney injury and predicts mortality in the intensive care unit                                             | Journal of the American Society of Nephrology     | 2005 | 243 | 22.09 | 83  |
| <b>83a</b> | Kay, J et al          | Acetylcysteine for prevention of acute deterioration of renal function following elective coronary angiography and intervention - A randomized controlled trial | JAMA- Journal of the American Medical Association | 2003 | 239 | 18.38 | 327 |

|            |                           |                                                                                                                           |                                                 |      |     |       |     |
|------------|---------------------------|---------------------------------------------------------------------------------------------------------------------------|-------------------------------------------------|------|-----|-------|-----|
| <b>83b</b> | Shusterman, N et al       | Risk factors and outcome of hospital-acquired acute renal failure.<br>Clinical epidemiologic study                        | American Journal of Medicine                    | 1987 | 239 | 8.24  | 254 |
| <b>83c</b> | Bonventre, Joseph V et al | Cellular pathophysiology of ischemic acute kidney injury                                                                  | Journal of Clinical Investigation               | 2011 | 239 | 47.80 | 228 |
| <b>84a</b> | Togel, Florian et al      | Vasculotropic, paracrine actions of infused mesenchymal stem cells are important to the recovery from acute kidney injury | American Journal of Physiology-Renal Physiology | 2007 | 237 | 26.33 | 284 |
| <b>84b</b> | Burne, MJ et al           | Identification of the CD4(+) T cell as a major pathogenic factor in ischemic acute renal failure                          | Journal of Clinical Investigation               | 2001 | 237 | 15.80 | 267 |
| <b>84c</b> | Waikar, Sushrut S et al   | Declining mortality in patients with acute renal failure, 1988 to 2002                                                    | Journal of the American Society of Nephrology   | 2006 | 237 | 23.70 | 254 |
| <b>85a</b> | Melnikov, VY et al        | Impaired IL-18 processing protects caspase-1-deficient mice from ischemic acute renal failure                             | Journal of Clinical Investigation               | 2001 | 236 | 15.73 | 253 |
| <b>85b</b> | Cigarroa, RG et al        | Dosing of contrast material to prevent                                                                                    | American Journal of Medicine                    | 1989 | 236 | 8.74  | 282 |

|            |                             |                                                                                                                                                                                         |                                     |      |     |       |     |
|------------|-----------------------------|-----------------------------------------------------------------------------------------------------------------------------------------------------------------------------------------|-------------------------------------|------|-----|-------|-----|
|            |                             | contrast nephropathy in patients with renal disease                                                                                                                                     |                                     |      |     |       |     |
| <b>86</b>  | Vinsonneau,Christophe et al | Continuous venovenous haemodiafiltration versus intermittent haemodialysis for acute renal failure in patients with multiple-organ dysfunction syndrome: a multicentre randomised trial | Lancet                              | 2006 | 235 | 23.50 | 312 |
| <b>87</b>  | Thurau, K et al             | Acute renal success. The unexpected logic of oliguria in acute renal failure                                                                                                            | American Journal of Medicine        | 1976 | 234 | 5.85  | 121 |
| <b>88a</b> | Firth, JD et al             | Endothelin: an important factor in acute renal failure?                                                                                                                                 | Lancet                              | 1988 | 233 | 8.32  | 276 |
| <b>88b</b> | Coca, Steven G et al        | Long-term Risk of Mortality and Other Adverse Outcomes After Acute Kidney Injury: A Systematic Review and Meta-analysis                                                                 | American Journal of Kidney Diseases | 2009 | 233 | 33.29 | 110 |
| <b>89</b>  | Marenzi, G et al            | The prevention of radiocontrast-agent-induced nephropathy                                                                                                                               | New England Journal of Medicine     | 2003 | 231 | 17.77 | 355 |

|            |                       |                                                                                                                                                                   |                                                 |      |     |       |     |
|------------|-----------------------|-------------------------------------------------------------------------------------------------------------------------------------------------------------------|-------------------------------------------------|------|-----|-------|-----|
|            |                       | by hemofiltration                                                                                                                                                 |                                                 |      |     |       |     |
| <b>90</b>  | Zanardo, G et al      | Acute renal failure in the patient undergoing cardiac operation. Prevalence, mortality rate, and main risk factors                                                | Journal of Thoracic and Cardiovascular Surgery  | 1994 | 229 | 10.41 | 275 |
| <b>91a</b> | Herrera, MB et al     | Mesenchymal stem cells contribute to the renal repair of acute tubular epithelial injury                                                                          | International Journal of Molecular Medicine     | 2004 | 228 | 19.00 | 273 |
| <b>91b</b> | Bouchard, Josee et al | Fluid accumulation, survival and recovery of kidney function in critically ill patients with acute kidney injury                                                  | Kidney International                            | 2009 | 228 | 32.57 | 264 |
| <b>92a</b> | Vaidya, VS et al      | Urinary kidney injury molecule-1: a sensitive quantitative biomarker for early detection of kidney tubular injury                                                 | American Journal of Physiology-Renal Physiology | 2006 | 227 | 22.70 | 294 |
| <b>92b</b> | Rich, MW et al        | Incidence, risk factors, and clinical course of acute renal insufficiency after cardiac catheterization in patients 70 years of age or older. A prospective study | Archives of Internal Medicine                   | 1990 | 227 | 8.73  | 283 |

|            |                         |                                                                                                           |                                               |      |     |       |     |
|------------|-------------------------|-----------------------------------------------------------------------------------------------------------|-----------------------------------------------|------|-----|-------|-----|
| <b>92c</b> | Stein, JH et al         | Current concepts on the pathophysiology of acute renal failure                                            | American Journal of Physiology                | 1978 | 227 | 5.97  | 64  |
| <b>93a</b> | Bates, DW et al         | Mortality and costs of acute renal failure associated with amphotericin B therapy                         | Clinical Infectious Diseases                  | 2001 | 226 | 15.07 | 285 |
| <b>93b</b> | Richards, WO et al      | Acute renal failure associated with increased intra-abdominal pressure                                    | Annals of Surgery                             | 1983 | 226 | 6.85  | 213 |
| <b>94a</b> | Supavekin, S et al      | Differential gene expression following early renal ischemia/reperfusion                                   | Kidney International                          | 2003 | 225 | 17.31 | 242 |
| <b>94b</b> | Diaz-Sandoval, LJ et al | Acetylcysteine to prevent angiography-related renal tissue injury (the APART Trial)                       | American Journal of Cardiology                | 2002 | 225 | 16.07 | 296 |
| <b>95</b>  | Bruno, Stefania et al   | Mesenchymal Stem Cell-Derived Microvesicles Protect Against Acute Tubular Injury                          | Journal of the American Society of Nephrology | 2009 | 224 | 32.00 | 230 |
| <b>96</b>  | Liangos, Orfeas et al   | Urinary N-acetyl-beta-(D)-glucosaminidase activity and kidney injury molecule-1 level are associated with | Journal of the American Society of Nephrology | 2007 | 222 | 24.67 | 260 |



|            |                   |                                                                                   |                                   |      |     |       |     |
|------------|-------------------|-----------------------------------------------------------------------------------|-----------------------------------|------|-----|-------|-----|
|            |                   | adverse outcomes in acute renal failure                                           |                                   |      |     |       |     |
| <b>97</b>  | Kuitunen, A et al | Acute renal failure after cardiac surgery: Evaluation of the RIFLE classification | Annals of Thoracic Surgery        | 2006 | 221 | 22.10 | 255 |
| <b>98</b>  | Morcos, SK et al  | Contrast-media-induced nephrotoxicity: a consensus report                         | European Radiology                | 1999 | 220 | 12.94 | 290 |
| <b>99</b>  | Ward, MM et al    | Factors predictive of acute renal failure in rhabdomyolysis                       | Archives of Internal Medicine     | 1988 | 218 | 7.79  | 242 |
| <b>100</b> | Heyman, SN et al  | Acute renal failure with selective medullary injury in the rat                    | Journal of Clinical Investigation | 1988 | 215 | 7.68  | 156 |

---

## Supplementary figure 1

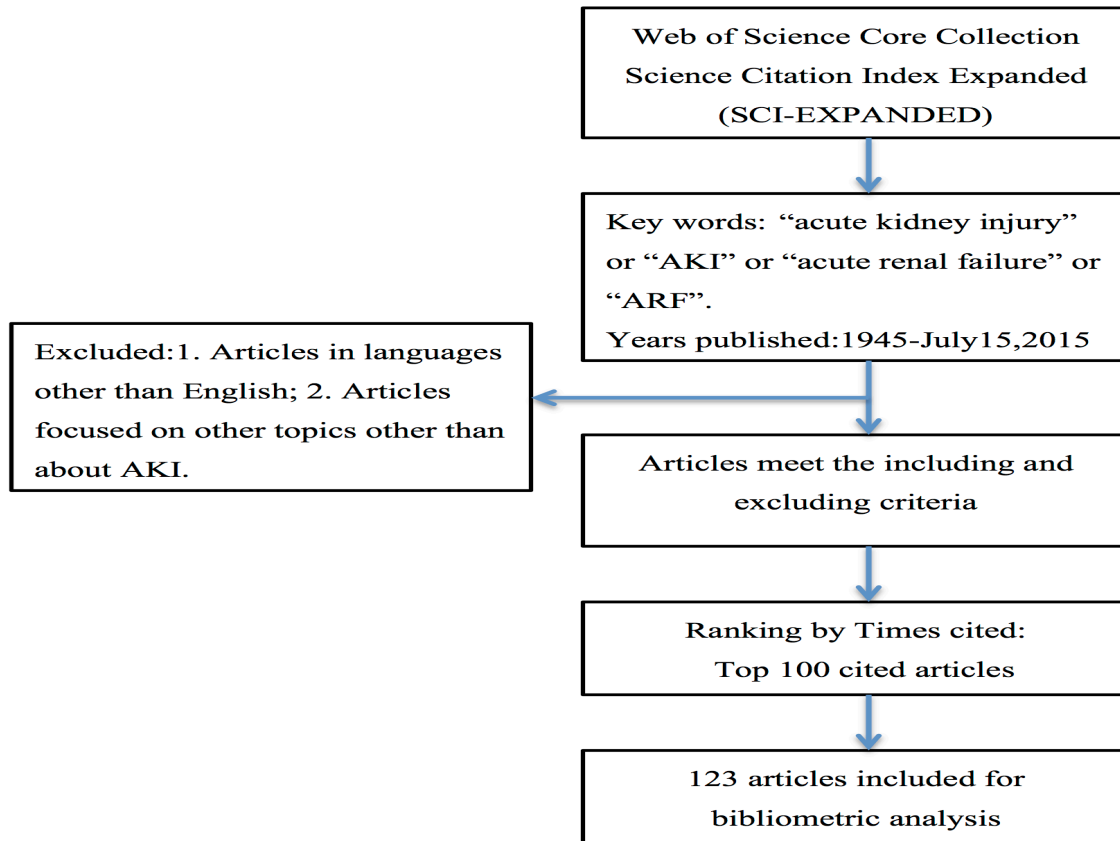

Supplement File: Flow diagram representing the study selection process
